# Supplementary material
Source: PubMed Central journal article supplement (PMC3654389)
Supplement: NIHMS466969-supplement-Supporting_online_Fig__1.pdf [file NIHMS466969-supplement-Supporting_online_Fig__1.pdf]

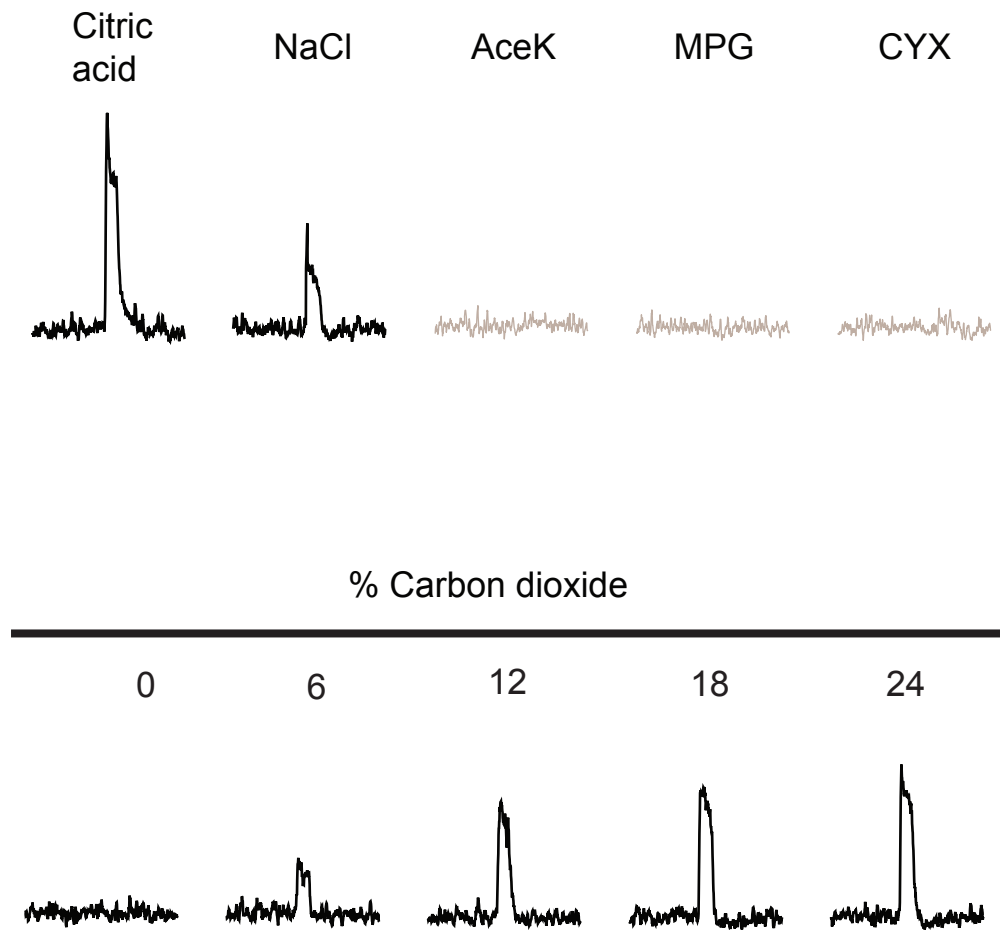

Fig. S1

Mice in which T1R and T2R cells have been ablated with diphtheria toxin show compound loss of all responses to sweet (AceK, 50 mM acesulfame K), umami (MPG, 30 mM monopotassium glutamate plus 1 mM inosine monophosphate) and bitter (CYX, 100 $\mu$ M cycloheximide) tastants but still respond to salty (250 mM NaCl) and sour (50 mM citric acid) stimuli. Importantly, responses to CO<sub>2</sub> are unaffected by ablation of the T1R and T2R cells.
