# Supplementary material
Source: PubMed Central journal article supplement (PMC3654389)
Supplement: NIHMS466969-supplement-Supporting_online_Fig__3.pdf [file NIHMS466969-supplement-Supporting_online_Fig__3.pdf]

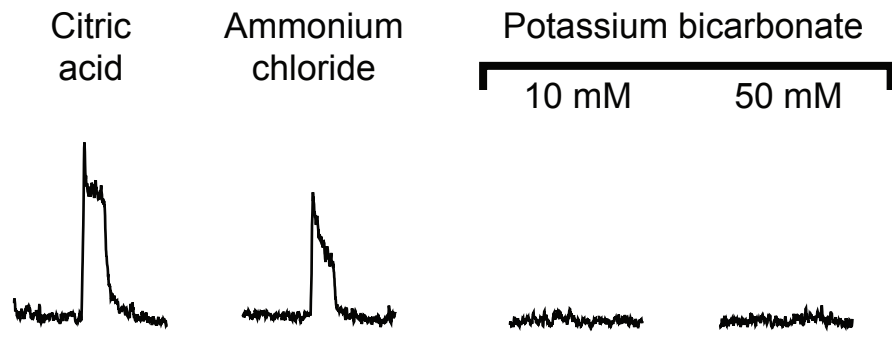

Fig. S3  
Potassium bicarbonate does not elicit taste responses; for comparison responses to 50 mM citric acid and 100 mM ammonium chloride are shown.
