# Supplementary material
Source: PubMed Central journal article supplement (PMC3654389)
Supplement: NIHMS466969-supplement-Supporting_online_Fig__4.pdf [file NIHMS466969-supplement-Supporting_online_Fig__4.pdf]

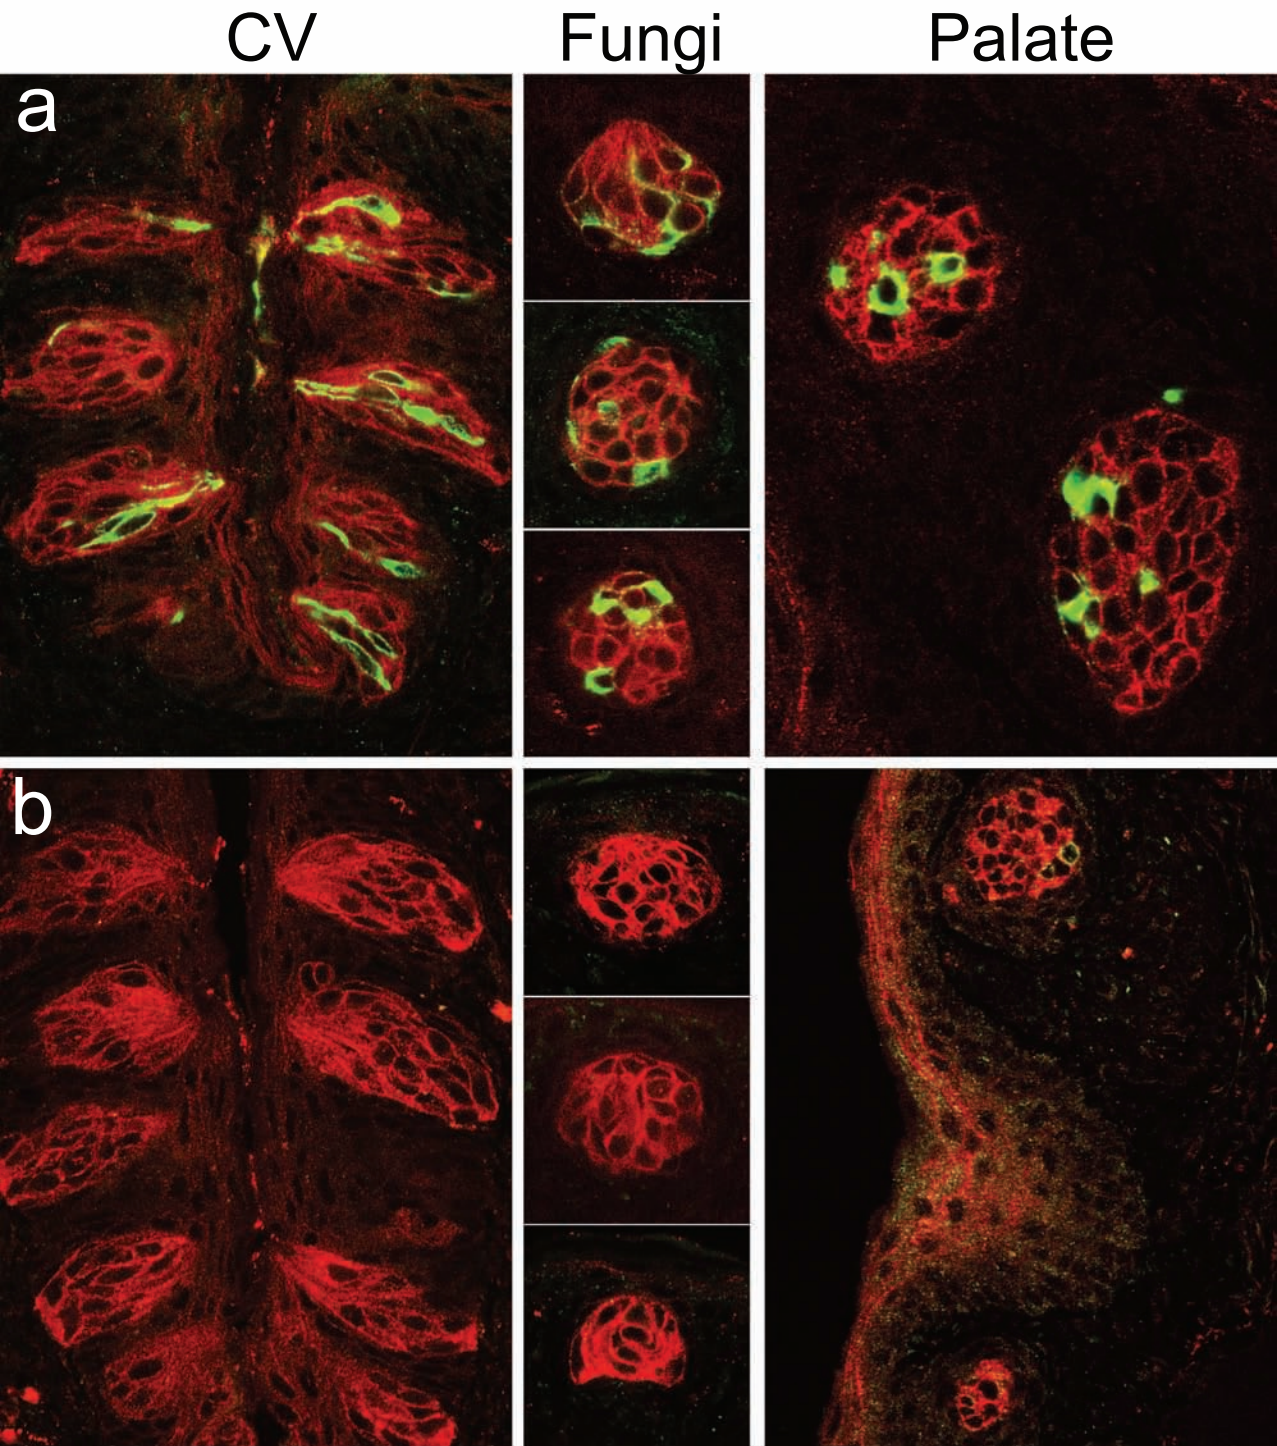

Car4 is expressed in subsets of TRCs in all classes of taste buds of the oral cavity. Shown are sections from circumvallate (CV), fungiform (Fungi) and palate taste-buds; Car4 (green) and claudin 7 (red). DTA mediated ablation of sour cells (b) eliminates taste bud expression of Car4 throughout the oral cavity.
