# Supplementary material
Source: PubMed Central journal article supplement (PMC3654389)
Supplement: NIHMS466969-supplement-Supporting_online_Fig__5.pdf [file NIHMS466969-supplement-Supporting_online_Fig__5.pdf]

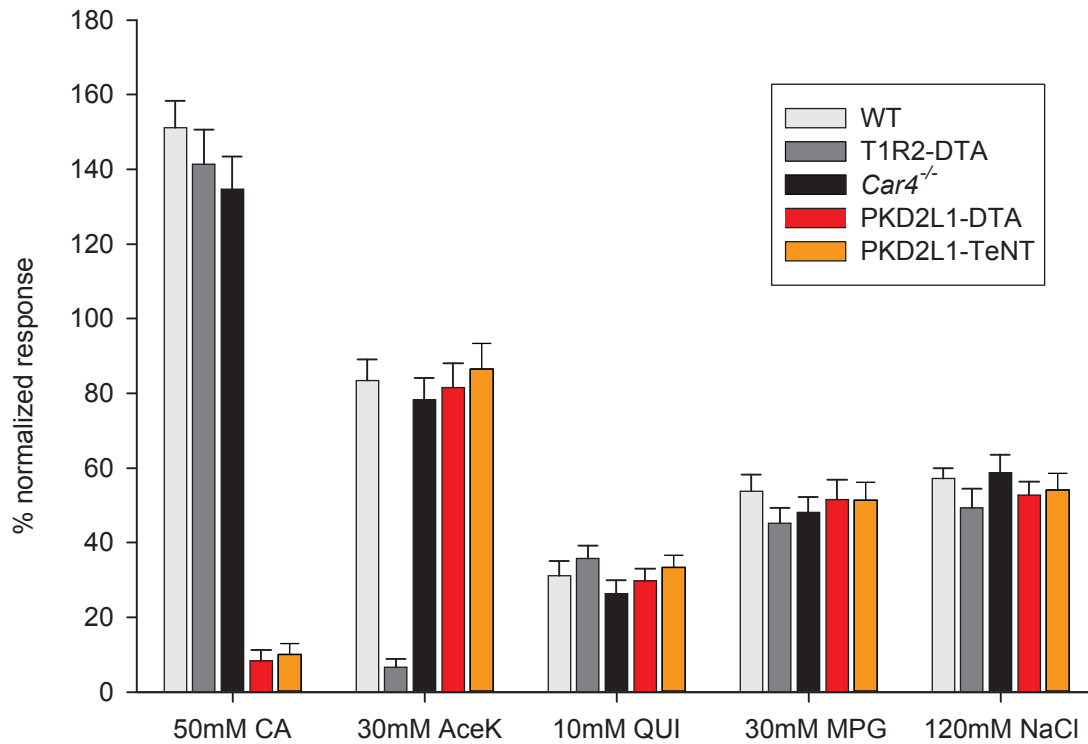

Fig. S5

Average neural responses to sweet, sour, bitter amino-acid (umami) and salty taste.

Note the specific loss of responses to AceK in the T1R2-DTA animals and the selective loss of citric acid responses in the PKD2L1-DTA and PKD2L1-TeNT animals. The values are mean±s.e.m (n=4) of chorda tympani responses normalized to the response of 250mM NaCl.
